# Supplementary material for: Dynamic covalent chemistry of imine polymers at the liquid/solid interface investigated by scanning tunneling microscopy
Source: Royal Society of Chemistry journal article supplement (doi:10.1039/c6ra27395e), 2017-01-01
Supplement: c6ra27395e1.pdf [file c6ra27395e1.pdf]

## Supporting Information

### Dynamic Covalent Chemistry of Imine Polymers at Liquid/solid Interfaces Investigated by Scanning Tunneling Microscopy

Yanxia Yu, Jianbin Lin and Shengbin Lei

#### 1 Additional STM images

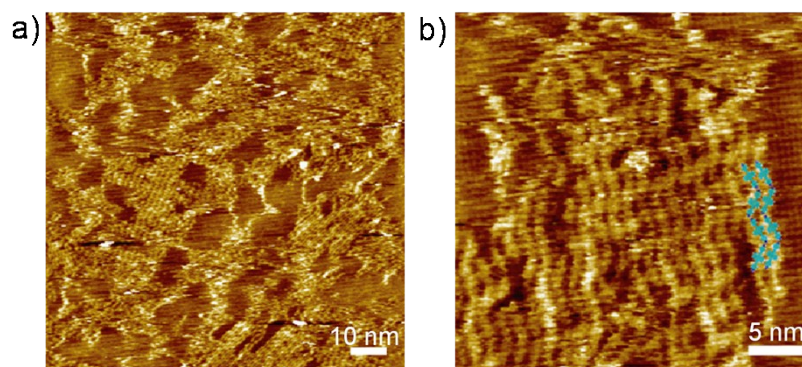

**Figure S1.** a) large-scale and b) high resolution STM images of the assembly of **4** ( $2.2 \times 10^{-5}$  mol/L) at the octanoic acid/HOPG. Imaging conditions: (a)  $I_{set} = 20$  pA,  $V_{bias} = 0.66$  V; (b)  $I_{set} = 25$  pA,  $V_{bias} = 0.60$  V.

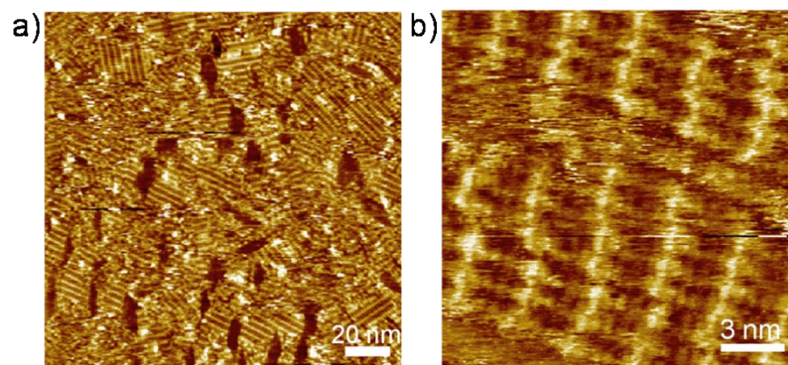

**Figure S2.** Large-scale and molecular-resolution STM images of 1DP derived from co-condensation of terephthalaldehyde with **4** at the octanoic acid/HOPG. Imaging conditions: (a)  $I_{set} = 22$  pA,  $V_{bias} = 0.77$  V; (b)  $I_{set} = 28$  pA,  $V_{bias} = 0.77$  V.

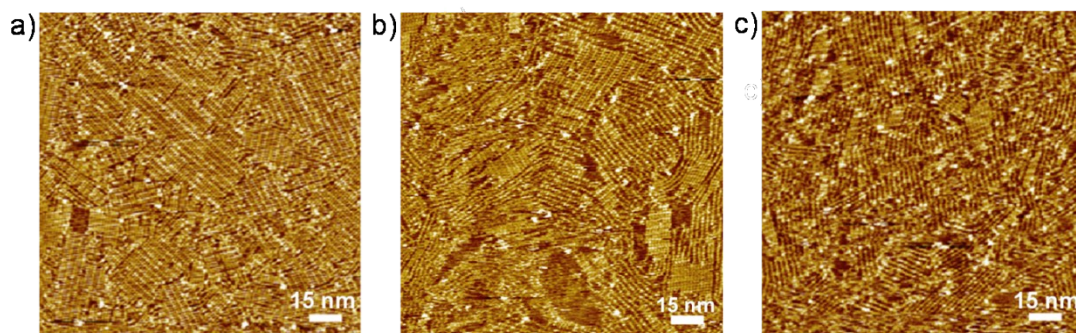

**Figure S3.** Typical wide-area STM images of the monolayer formed by a three-component mixture of **2**, **3** and **4** in octanoic acid in the ratio 3:1.5:1.5 (a), 3:2:1 (b), 3:2.5:0.5 (c), is dropcasted on the HOPG surface. Imaging conditions: (a)  $I_{set} = 39$  pA,  $V_{bias} = 0.60$  V; (b)  $I_{set} = 22$  pA,  $V_{bias} = 0.77$  V; (c)  $I_{set} = 38$  pA,  $V_{bias} = 0.38$  V.

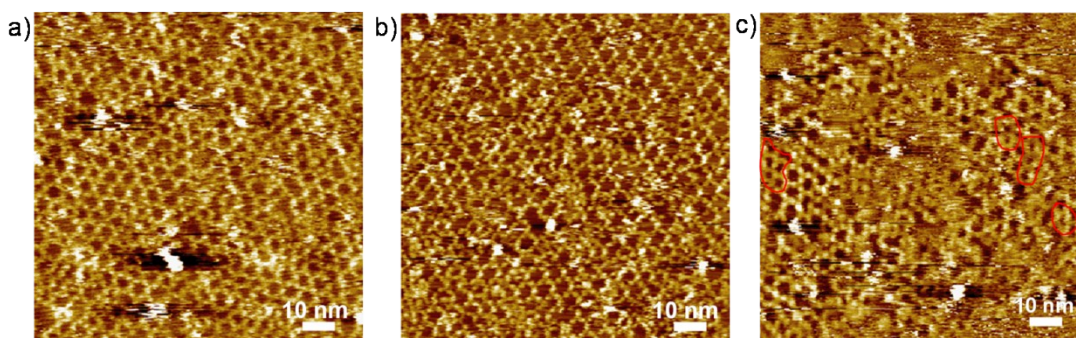

**Figure S4.** Typical STM images of the monolayer formed by a three-component mixture of **1**, **3** and **4** with the molar ratio 4:3:3 (a), 2:3:3 (b) and 4: 5: 1 (c). The domains of  $2DP_{1+3}$  are marked by the red circles. Imaging conditions: (a)  $I_{set} = 24$  pA,  $V_{bias} = 0.66$  V; (b)  $I_{set} = 28$  pA,  $V_{bias} = 0.60$  V; (c)  $I_{set} = 28$  pA,  $V_{bias} = 0.66$  V.

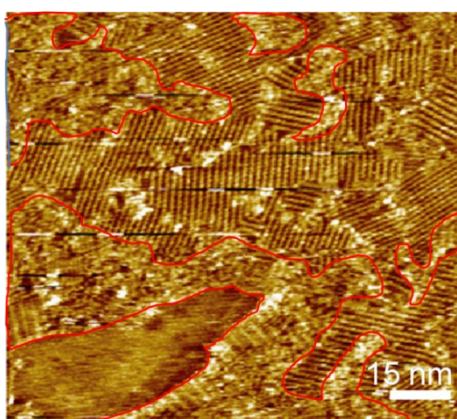

**Figure S5.** Representative STM images show the coexistence of  $1DP_{2+3}$  and  $1DP_{2+4}$  after about 780 minutes of the addition of **4** on top of a pre-existing monolayer of  $1DP_{2+3}$  ( $I_{set} = 19$  pA,  $V_{bias} = 0.60$  V). Domains of  $1DP_{2+4}$  are marked by the red curves.

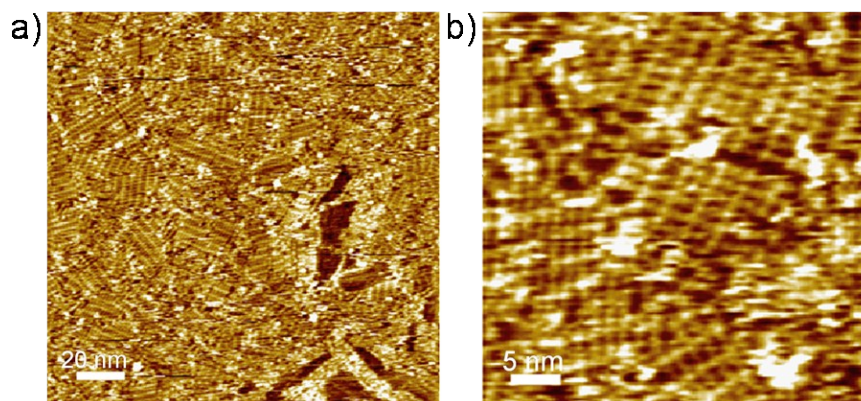

**Figure S6.** STM images showing that the amine exchange in  $1DP_{1+3}$  by **4** was accomplished after annealing at  $100\text{ }^{\circ}\text{C}$  for 30 minutes. (a)  $I_{set} = 22\text{ pA}$ ,  $V_{bias} = 0.60\text{ V}$ ; (b)  $I_{set} = 20\text{ pA}$ ,  $V_{bias} = 0.60\text{ V}$ .

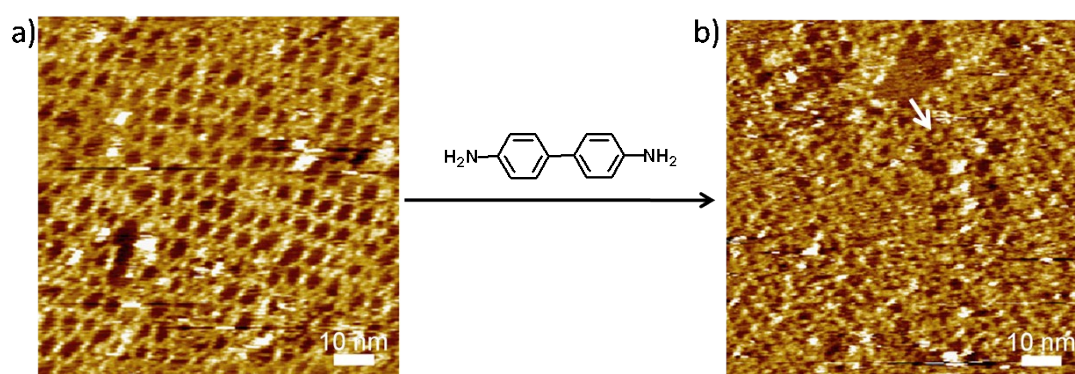

**Figure S7.** STM representative images of *in situ* amine exchange process in case of  $2DP_{1+4}$ . On the *in situ* addition of **3** on top of a pre-existing monolayer of  $2DP_{1+4}$  (a), a large portion of the cavities of the  $2DP_{1+4}$  network appear filled (b). Imaging conditions: (a)  $I_{set} = 26\text{ pA}$ ,  $V_{bias} = 0.60\text{ V}$ ; (b)  $I_{set} = 26\text{ pA}$ ,  $V_{bias} = 0.60\text{ V}$ .

## 2 NMR experiment

### 2.1 2+3 condensation

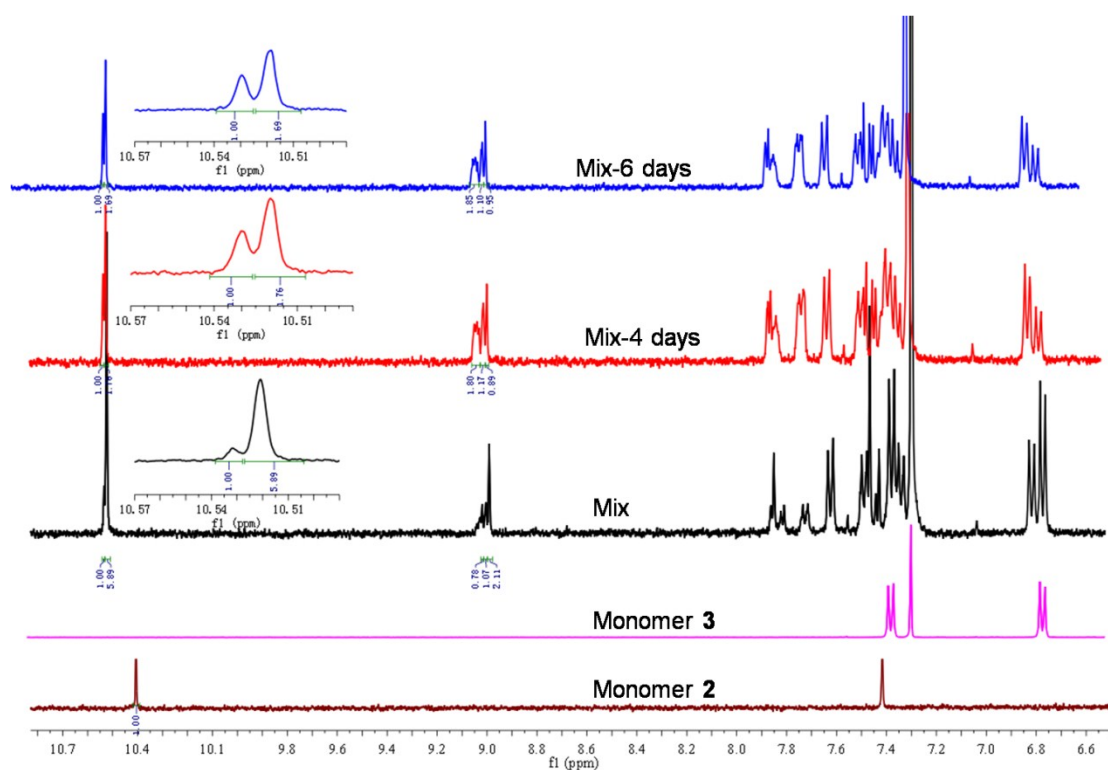

**Figure S8.** The <sup>1</sup>H-NMR spectrums (400 MHz, 298K) of monomer **3** in CDCl<sub>3</sub>, monomer **2** in DMSO-*d*<sub>6</sub> and the mixture of aldehyde **2** with **3** (molar ratio: 1:1, C<sub>3</sub>=2.3×10<sup>-3</sup> mol/L) in CDCl<sub>3</sub> after lay aside for 0 day, 4 days and 6 days, respectively.

## 2.2 2+4 condensation

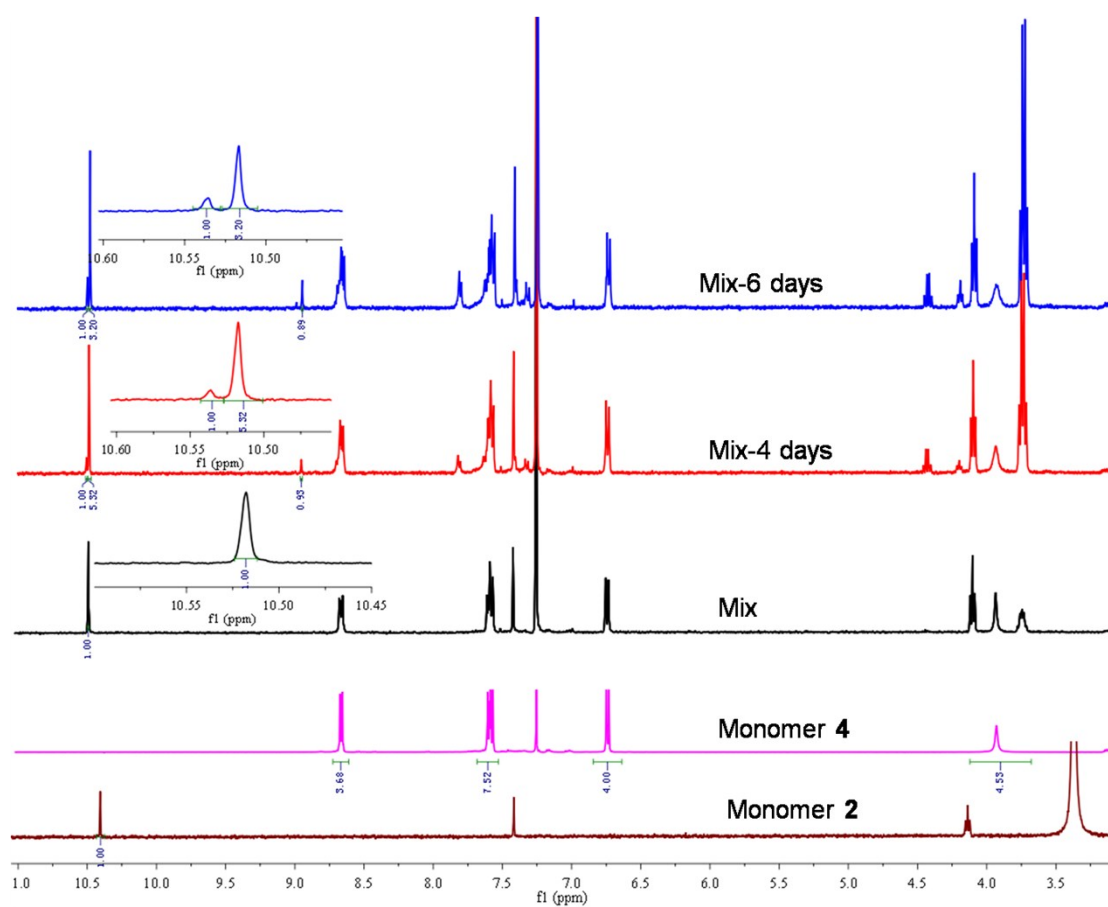

**Figure S9.** The <sup>1</sup>H-NMR spectrums (400 MHz, 298K) of monomer **4** in CDCl<sub>3</sub>, monomer **2** in DMSO-*d*<sub>6</sub> and the mixture of aldehyde **2** with **4** (molar ratio: 1:1, C<sub>4</sub>=1.9×10<sup>-3</sup> mol/L) in CDCl<sub>3</sub> after lay aside for 0 day, 4 days and 6 days, respectively.
